# Supplementary material for: Synthesis, structure, characterization and theoretical studies of NLO active furan-2-carbohydrazide monohydrate derivative single crystals
Source: Royal Society of Chemistry journal article supplement (doi:10.1039/c5ra07936e), 2015-01-01
Supplement: c5ra07936e1.pdf [file c5ra07936e1.pdf]

**Supplementary Figure captions**

**Fig S1.** Tauc plot of IFC (a) direct and (b) indirect band gap energy.

**Fig S2.** Indexed powder XRD patterns of IFC.

**Fig S3.** 3D images of Hydrogen bonding interaction (a) ORTEP and (b) packing of IFC.

**Fig S4.** Relative contribution of various intermolecular interactions in IFC.

**Fig. S5.** Projection of crystal packing along a-axis with the C–H···O interactions.

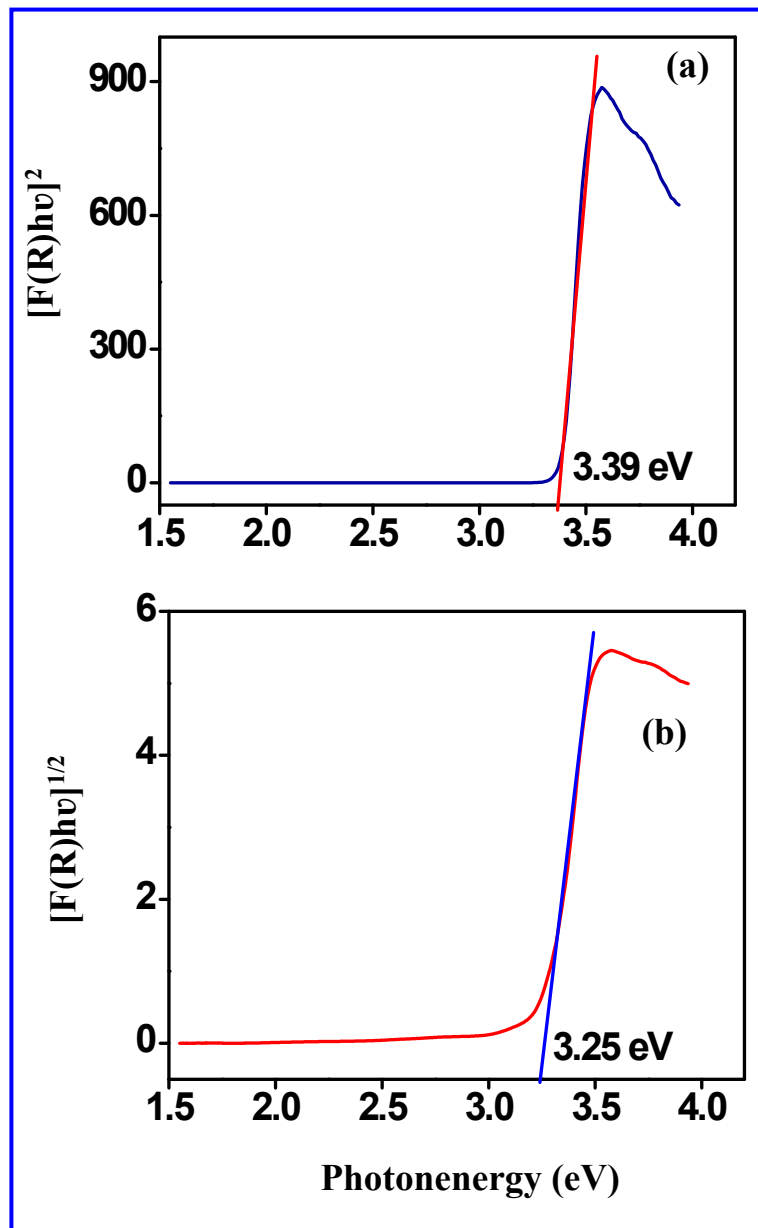

Fig. S1

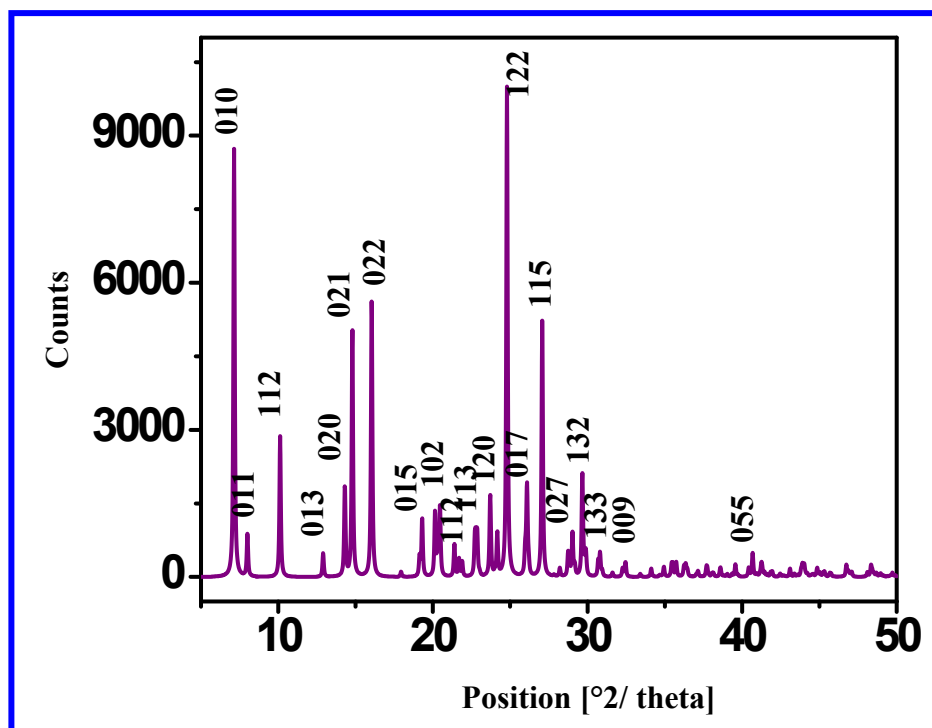

Fig. S2

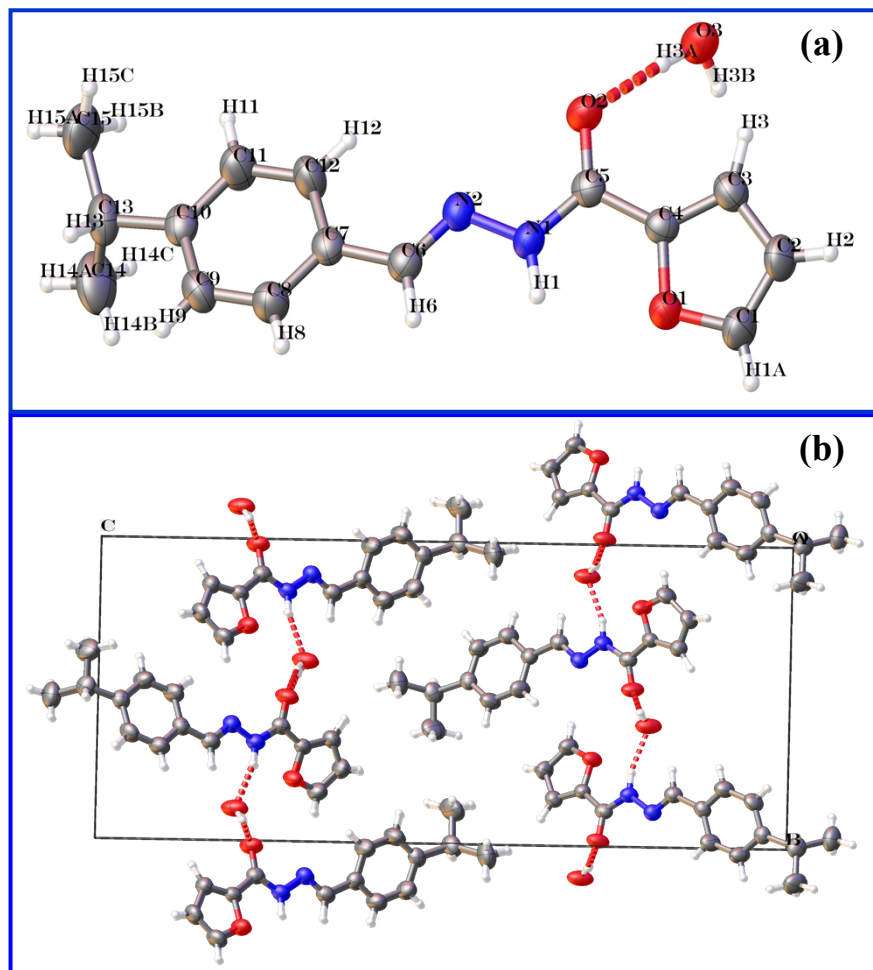

Fig. S3

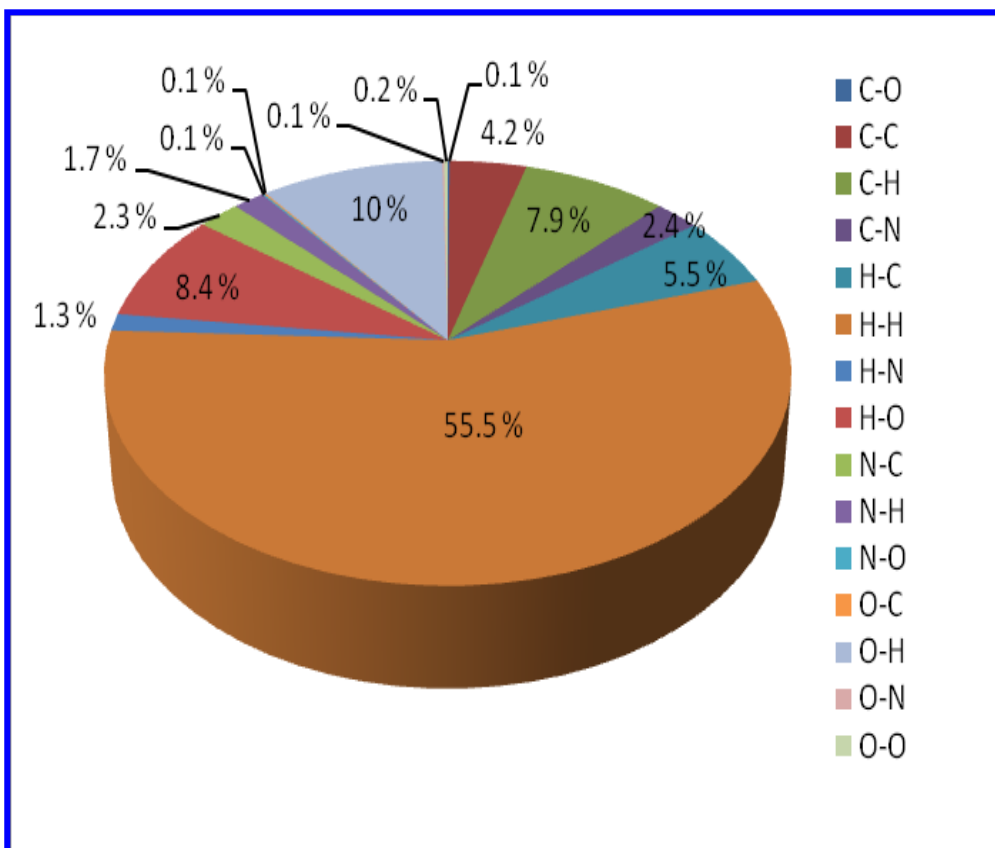

**Fig. S4**

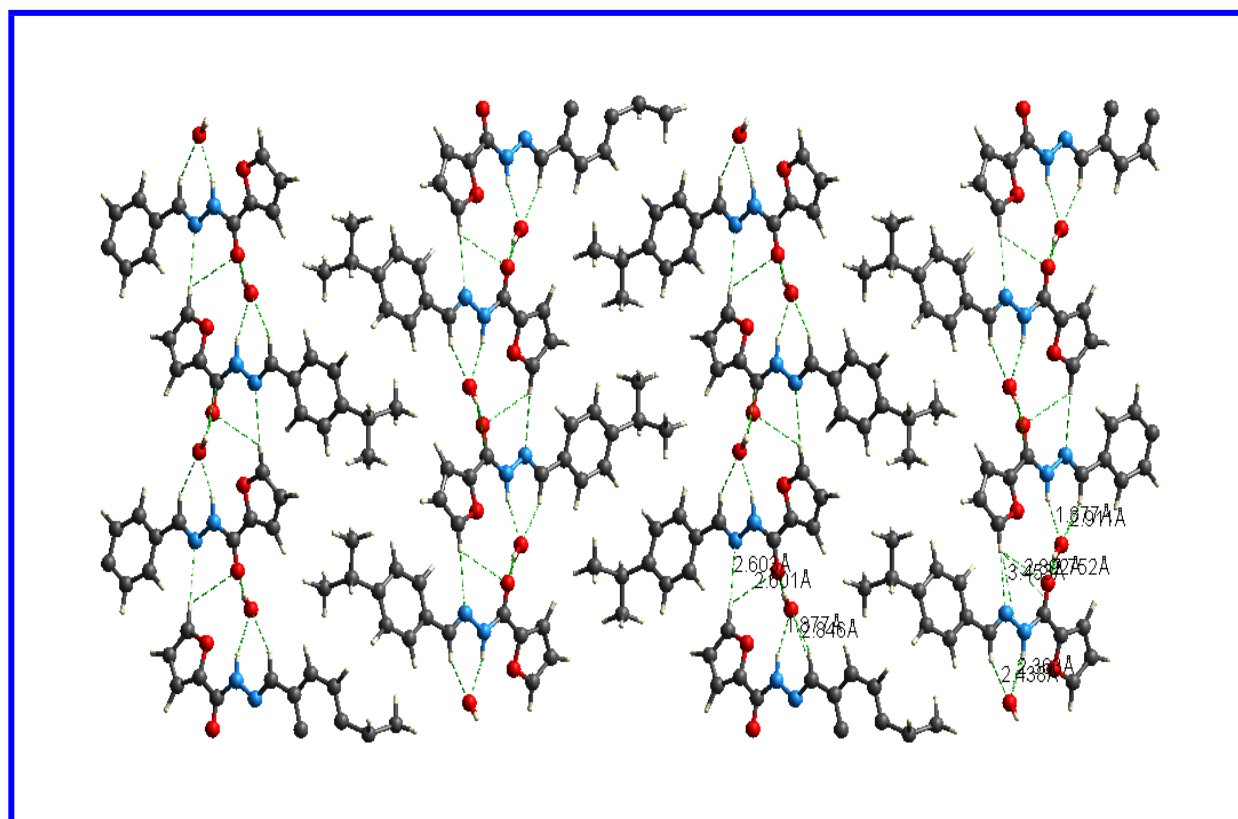

**Fig. S5**

**Table S1** Observed vibrational bands of IFC (cm<sup>-1</sup>)

| <b>Assignments of vibration</b>   | <b>FT-IR</b>   |
|-----------------------------------|----------------|
| C=O stretching                    | 1643           |
| C=N stretching                    | 1616           |
| Aromatic C=C stretching           | 1521,1473      |
| Aromatic C-H stretching           | 3112, 3134     |
| N-H asymmetric stretching         | 3424           |
| N-H bending                       | 1584           |
| O=C-N stretching                  | 1019           |
| C-O-C stretching                  | 1189           |
| Aliphatic C-H stretching          | 2953,2882,2843 |
| Aliphatic C-H deformation         | 832            |
| Aromatic C-H out of plane bending | 745            |
